# Supplementary material
Source: MDPI journal article supplement (https://www.mdpi.com/2073-4395/12/12/3122)
Supplement: s1 [file s1]

**Table S1. ANOVA (Analysis of Variance) using Augmented Block Design**

|                                      | <b>D<br/>F</b> | <b>50%DF</b> | <b>80% DM</b> | <b>Yield/<br/>Plant<br/>(IN)</b> | <b>Yield/<br/>Plant<br/>(NIP)</b> | <b>1000<br/>Seed<br/>wt.(g)</b> | <b>Oil<br/>Conte<br/>nt (%)</b> | <b>DI %</b> |
|--------------------------------------|----------------|--------------|---------------|----------------------------------|-----------------------------------|---------------------------------|---------------------------------|-------------|
| Block<br>(ignoring Treatments)       | 3              | 52.96 **     | 31.06 **      | 0.546                            | 1.87                              | 0.28 **                         | 5.60**                          | 0.005       |
| Treatment<br>(eliminating Blocks)    | 29             | 39.01 **     | 47.36 **      | 1.37 **                          | 4.17 **                           | 1.34**                          | 3.36 **                         | 081**       |
| Checks                               | 5              | 73.44 **     | 120.74 **     | 3.96 **                          | 10.27 **                          | 2.27 **                         | 3.43 *                          | 1.30 **     |
| Checks + Var vs. Var                 | 24             | 31.84 **     | 32.07 **      | 0.831                            | 2.91**                            | 1.146 **                        | 3.35**                          | 0.70* *     |
| Error                                | 15             | 1.57         | 1.12          | 0.412                            | 0.75                              | 0.017                           | 0.84                            | 0.079       |
| Block<br>(Eliminating<br>Check+Var.) | 3              | 1.38         | 1.49          | 1.10                             | 2.27                              | 0.20 **                         | 3.49**                          | 0.80        |
| Entries<br>(ignoring Blocks)         | 29             | 44.35 **     | 50.42 **      | 1.31*                            | 4.13 **                           | 1.34 **                         | 8.44**                          | 0.78 **     |
| Checks                               | 5              | 73.44 **     | 120.74 **     | 3.96 **                          | 10.26 **                          | 2.27**                          | 3.42 *                          | 1.29 **     |
| Varieties                            | 23             | 39.39 **     | 34.81**       | 0.79                             | 2.31 *                            | 1.19 **                         | 4.10 **                         | 0.55 **     |
| Checks vs. Varieties                 | 1              | 13.02 *      | 57.82 **      | 0.156                            | 15.42 **                          | 0.26 **                         | 0.66                            | 3.59**      |

DF- degree of freedom, 50% DF- Days to 50% Flowering, 80% DM- Days to 80% Maturity, NIP- Non-Infected Plants, IN- Infected Plants, DI-Disease Incidence (%)

**Table S2. List of amplicon sequences showing the presence of *BjuWRR1* gene**

| Sl. No. | Genotypes  | Gene sequence                                                                                                                                                                                                                                                                                                                                                                        |
|---------|------------|--------------------------------------------------------------------------------------------------------------------------------------------------------------------------------------------------------------------------------------------------------------------------------------------------------------------------------------------------------------------------------------|
| 1.      | BIO-YSR    | AGGGGGGGTTTAAAAACAACAGTAAACCATAATGAAATCTCCTTCACCGGCCTACTATATAAAAAATCATATTTTATTAAA<br>TAACATATAAAATCTGATATTGATATGTTTGTATTAAAGATATTGTTTTTATATTAAATTTCTTTTGAGTTATATAAAAGGA<br>ATTTTTTTATATTAAATTACATGATATAAAAAATGTTATATATTTATTAAAGATATTTCTTTTGTATAATAAAGTGATTGA<br>AAACAAATATAAAAAATGTTAAATTGAAATATTAATAGTGGTATTTTAAACAATAAAATTTTATTCATTAAGTTATCACTGTGA<br>TTTACCATTCTAAGAATCAACAAAA    |
| 2.      | CAULC-1    | ATCCGGGCGTAAACACACAAGAAACCAAACCTGAAACCTCCACCGGCCCCCAAAAAACAAAAACATTTTCCGCCG<br>ATCACATCTCAAATCCCGATCACCGATCAGTTTCGTATTCAAGAACATCGTTTTTTATATTAAATCCTCTTCCCGAGTTAT<br>ATAAAAGGAATTTTCTTTATATTAAATTACATGATATAAAAAATGTTATATATTTATTAAAGATATTTCTTTTGTATAATA<br>AGTGATTGAAAACAAATATAAAAAATGTTAAATTGAAATATTAATAGTGGTATTTTAAACAATAAAATTTTATTCATTAAGTT<br>ATCACTGTGATTTACCATTCCAGAATCCCACCAAAT |
| 3.      | CAULC-3    | CCCGGGGGTTTATTATAAGAATCATAATGAATCTCTTACGGCCTCCTATATAAAAAATCATTTTATTAAATAACATATAA<br>ATCTGATATTGATATGTTTGTATTAAAGATATTGTTTTTTATATTAAATTTCTTTTGAGTTATATAAAAGGAATTTTATATA<br>TTAAATTACATGATATAAAAAATGTTATATATTTATTAAAGATATTTCTTTTGTATAATAAAGTGATTGAAAACAAATAT<br>AAAAATGTTAAATTGAAATATTAATAGTGGTATTTTAAACAATAAAATTTTATTCATTAAGTTATCACTGTGATTTACCATTCT<br>AAGAAATCAACAA                  |
| 4.      | CAUR M 4-1 | CCCGGCGTTTTATACACAGTAATTCATTACTGAAATCTCTTACGGCCTCCTATATAAAAAATCATTTTATTAAATAACAT<br>ATAAATCTGATATTGATATGTTTGTATTAAAGATATTGTTTTTTATATTAAATTTCTTTTGAGTTATATAAAAGGAATTTT<br>TTATATTAAATTACATGATATAAAAAATGTTATATATTTATTAAAGATATTTCTTTTGTATAATAAAGTGATTGAAAACA<br>AATATAAAAAATGTTAAATTGAAATATTAATAGTGGTATTTTAAACAATAAAATTTTATTCATTAAGTTATCACTGTGATTAC<br>CATTCTAAGAATCAACAAAA             |
| 5.      | CAUR M 4-2 | CCCGGGCGTTAATATACAGTAAGTCCATACTGAAATCTCTTACGGCCTCCTATATAAAAAATCATTTTATTAAATAACA<br>TATAAATCTGATATTGATATGTTTGTATTAAAGATATTGTTTTTTATATTAAATTTCTTTTGAGTTATATAAAAGGAATTTT<br>TTTATATTAAATTACATGATATAAAAAATGTTATATATTTATTAAAGATATTTCTTTTGTATAATAAAGTGATTGAAAACA<br>AATATAAAAAATGTTAAATTGAAATATTAATAGTGGTATTTTAAACAATAAAATTTTATTCATTAAGTTATCACTGTGATTAC<br>CCATTCTAAGAATCAACAAAA           |
| 6.      | CAULC-4    | CTCGGGGGTTAATTATAAGAATCATCATGAATCTCTGACTGCCTCCTATATAAAAAATCATTTTATTAAATAGCATATA<br>AATCTGATATTGATATGTTTGTATTAAAGATATTGTTTTTTATATTAAATTTCTTTTGAGTTATATTAAAGGAATTTT<br>TATATTGAATTACATGATATTAAATGTTATATCTTTATTCAAGATATTTCCATTTTGTATAATAAATTGATTGCAACAA<br>AACATCAAGATGTTAAATTGTAATATTAATAGTGGTAATTAAACAATAAAATTTATTCATAAAGTTATCACTGTGACTTA<br>CGATTCTTAGGAATCTACAT                     |
